# Supplementary material
Source: PubMed Central journal article supplement (PMC4200019)

**Supplemental Table 1. Subject specific slope**

| Blinded ID | <b>log<sub>10</sub>(total HIV-1 DNA cps/10<sup>6</sup> CD4+ T-cells) slope/year</b> |                                |                                |                                        |                                        |
|------------|-------------------------------------------------------------------------------------|--------------------------------|--------------------------------|----------------------------------------|----------------------------------------|
|            | <b>Pre-ART to year 1 on ART</b>                                                     | <b>Year 1 to year 4 on ART</b> | <b>Year 4 to year 7 on ART</b> | <b>Year 4 through follow-up on ART</b> | <b>Year 7 through follow-up on ART</b> |
| 1          | -0.9620                                                                             | -0.1365                        | 0.0205                         | -0.0012                                | -0.0296                                |
| 2          | -0.7878                                                                             | -0.1465                        | -0.1948                        | -0.0485                                | 0.0040                                 |
| 3          | -1.1200                                                                             | -0.1102                        | -0.0467                        | -0.0386                                | -0.0294                                |
| 4          | -1.2453                                                                             | 0.0569                         | .                              | -0.0455                                | 0.2518                                 |
| 5          | -0.5116                                                                             | -0.1708                        | -0.0170                        | -0.0341                                | -0.0465                                |
| 6          | -0.7746                                                                             | -0.1461                        | -0.0339                        | -0.0310                                | -0.0272                                |
| 7          | -0.3598                                                                             | -0.1918                        | -0.0008                        | 0.0230                                 | 0.0377                                 |
| 8          | -0.8509                                                                             | -0.0620                        | 0.0043                         | -0.0131                                | -0.0191                                |
| 9          | -0.8652                                                                             | -0.2243                        | 0.1657                         | 0.0520                                 | -0.0086                                |
| 10         | -0.7472                                                                             | -0.0880                        | -0.0092                        | -0.0205                                | -0.0273                                |
| 11         | -1.9649                                                                             | -0.1125                        | -0.0090                        | -0.0876                                | -0.1448                                |
| 12         | -0.7649                                                                             | -0.1027                        | -0.0234                        | -0.0056                                | 0.0145                                 |
| 13         | -0.4749                                                                             | -0.0710                        | -0.0149                        | 0.0020                                 | 0.0246                                 |
| 14         | -0.5523                                                                             | -0.0035                        | -0.1198                        | -0.2331                                | -0.4150                                |
| 15         | -0.9839                                                                             | -0.1693                        | 0.0206                         | -0.0044                                | -0.0318                                |
| 16         | -0.5765                                                                             | -0.0578                        | 0.0844                         | 0.0160                                 | -0.0055                                |
| 17         | -1.5991                                                                             | -0.1096                        | -0.0273                        | -0.0129                                | -0.0023                                |
| 18         | -1.3161                                                                             | -0.2093                        | -0.0606                        | -0.0200                                | 0.0071                                 |
| 19         | -0.7258                                                                             | -0.2012                        | 0.0225                         | -0.0030                                | -0.0347                                |
| 20         | -0.5013                                                                             | -0.2412                        | 0.0856                         | 0.0595                                 | 0.0204                                 |
| 21         | -0.9548                                                                             | -0.1572                        | -0.0655                        | -0.0634                                | -0.0605                                |
| 22         | -1.0475                                                                             | -0.0556                        | -0.0224                        | -0.0119                                | -0.0008                                |
| 23         | -1.6690                                                                             | -0.0411                        | -0.0839                        | -0.0270                                | 0.0275                                 |
| 24         | -0.9609                                                                             | -0.1035                        | -0.0668                        | -0.0240                                | 0.0316                                 |
| 25         | -0.8617                                                                             | -0.0115                        | -0.0394                        | -0.0394                                | .                                      |
| 26         | -0.8173                                                                             | -0.0539                        | -0.1128                        | -0.0329                                | -0.0056                                |
| 27         | -0.2464                                                                             | -0.1016                        | -0.0957                        | 0.0187                                 | 0.0544                                 |
| 28         | -1.0025                                                                             | -0.2034                        | -0.0002                        | -0.0334                                | -0.0759                                |
| 29         | -0.5898                                                                             | -0.1125                        | 0.0207                         | 0.0083                                 | -0.0080                                |
| 30         | -1.1161                                                                             | -0.1190                        | 0.0974                         | 0.0461                                 | -0.0050                                |

Supplemental Figure 1. Summary of HIV DNA, 2-LTR circles and SCA HIV RNA levels over time for the 24 remaining patients

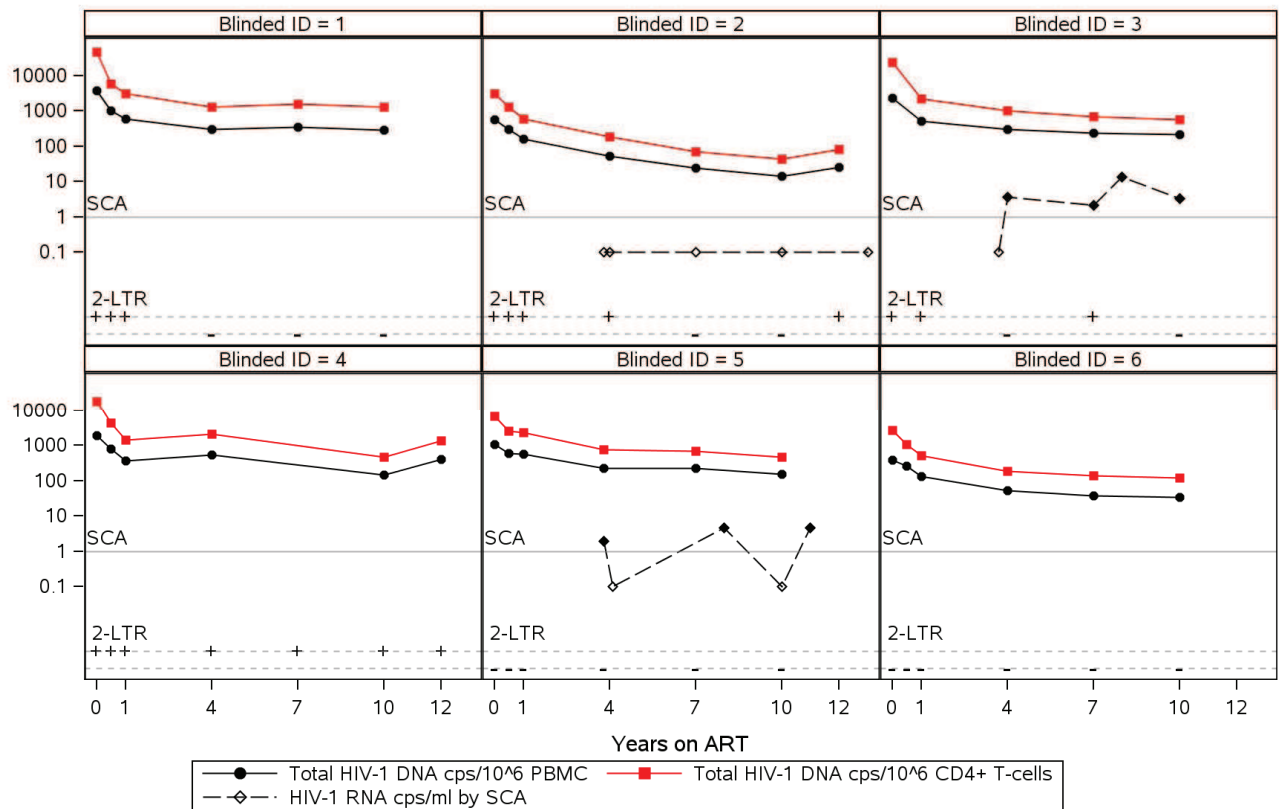

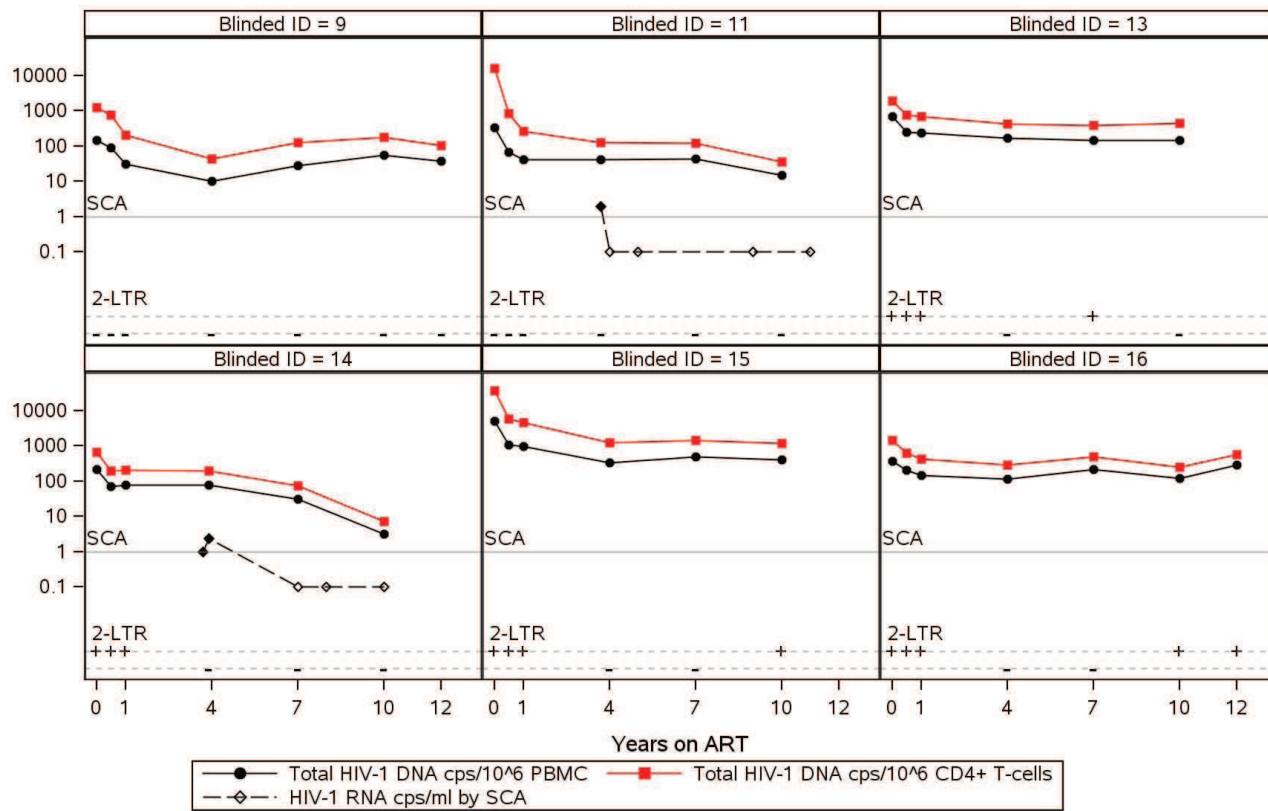

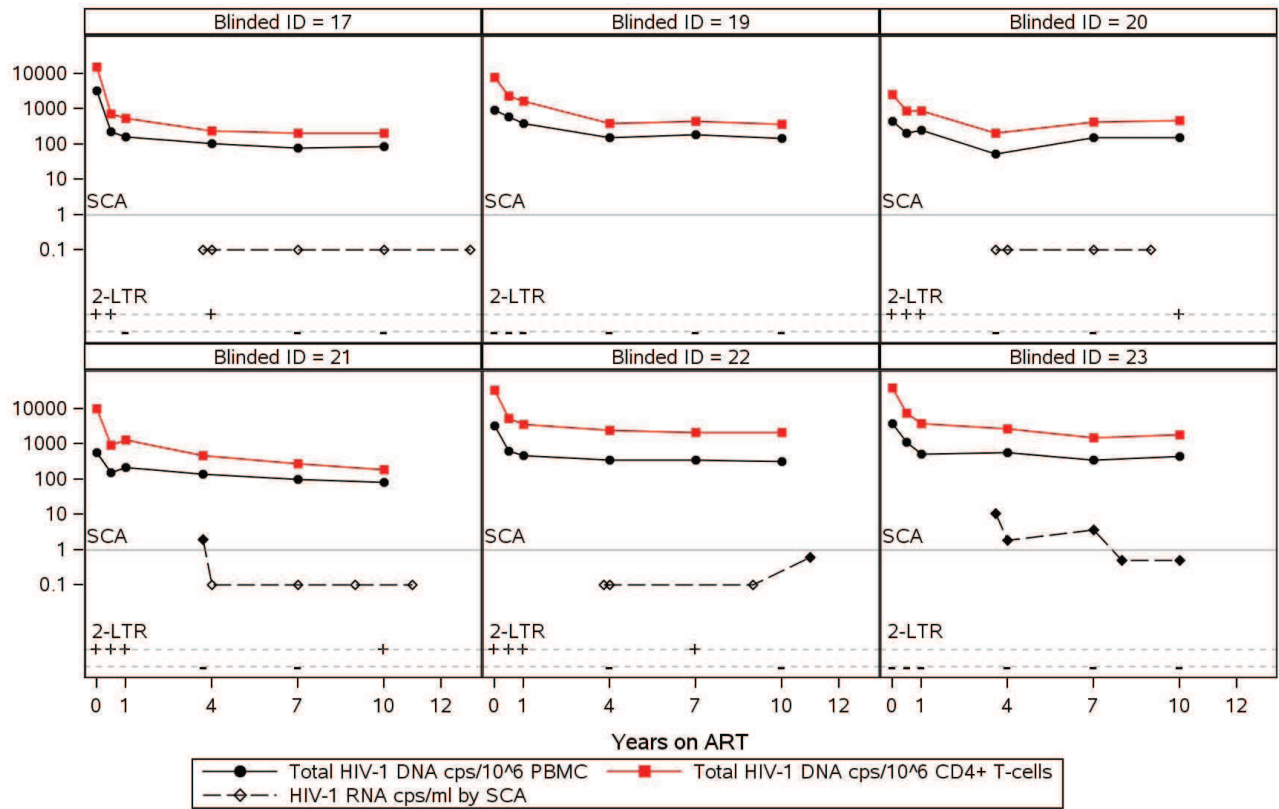

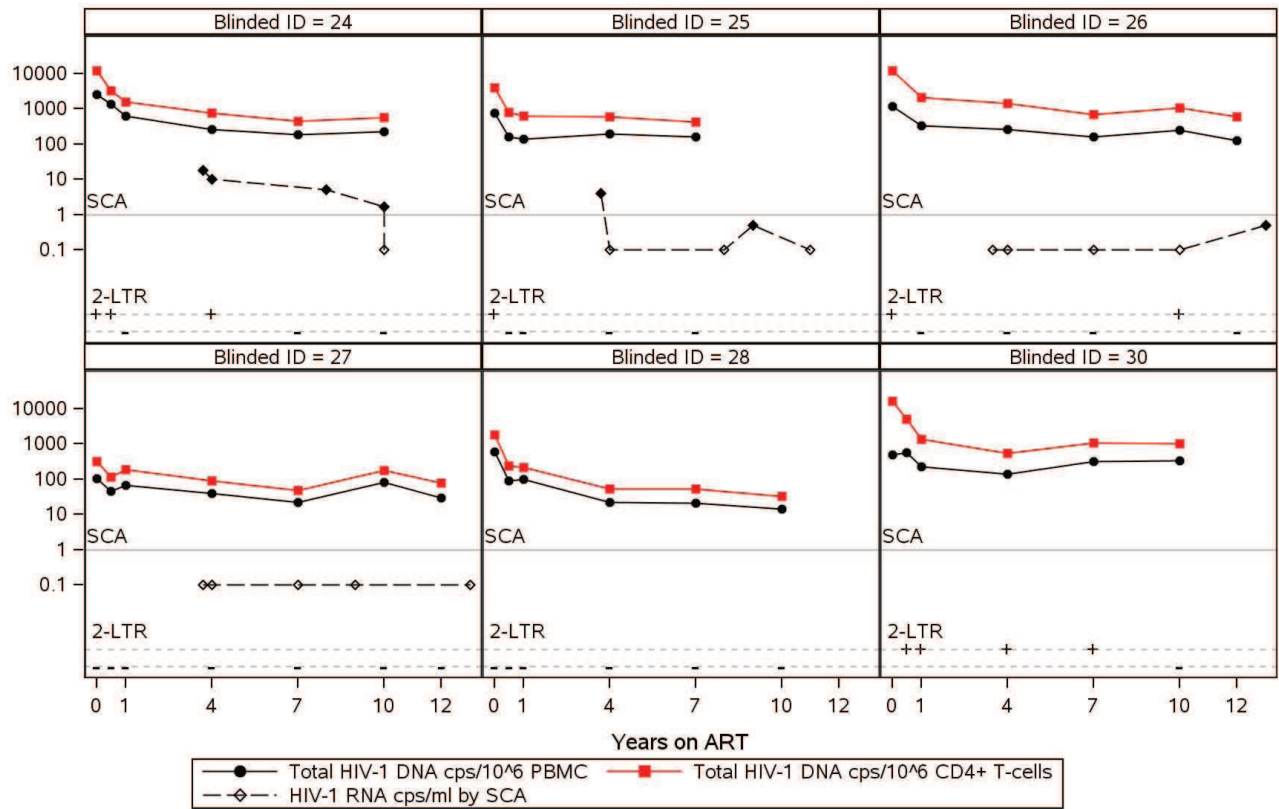

Supplement: supp_ciu585_ciu585supp.pdf [file supp_ciu585_ciu585supp.pdf]
